# Supplementary material
Source: PubMed Central journal article supplement (PMC6462436)
Supplement: NIHMS1518486-supplement-Supp_table.pdf [file NIHMS1518486-supplement-Supp_table.pdf]

**Supplementary Table 1:** List of overlapping peaks between Dpnl-seq and N6amt1 chIP-seq.

| Chr  | Position  | Distance_to_TSS_nearest | Gene_ID    | distance_from_nearest_m6A |
|------|-----------|-------------------------|------------|---------------------------|
| chr1 | 9847946   | -335                    | Sgk3       | 78                        |
| chr1 | 24177502  | -108                    | Col9a1     | 121                       |
| chr1 | 26687498  | -39                     | 4931408C20 | 35                        |
| chr1 | 26687563  | -104                    | 4931408C20 | 100                       |
| chr1 | 28780382  | -131                    | Gm597      | 70                        |
| chr1 | 30863531  | -276                    | Phf3       | 370                       |
| chr1 | 31176247  | -188                    | Lgsn       | 72                        |
| chr1 | 31176351  | -84                     | Lgsn       | 32                        |
| chr1 | 31264475  | -372                    | Gm4850     | 221                       |
| chr1 | 37865531  | -453                    | Tsga10     | 34                        |
| chr1 | 40465992  | -14                     | Il18r1     | 5                         |
| chr1 | 43445537  | -214                    | Nck2       | 248                       |
| chr1 | 43828162  | -455                    | Uxs1       | 105                       |
| chr1 | 46853604  | -96                     | Slc39a10   | 116                       |
| chr1 | 52844761  | -285                    | Hibch      | 439                       |
| chr1 | 57774723  | -138                    | Spats2l    | 27                        |
| chr1 | 57984919  | -421                    | Sgol2      | 287                       |
| chr1 | 57985241  | -99                     | Sgol2      | 29                        |
| chr1 | 59704704  | -104                    | Snord11    | 188                       |
| chr1 | 64121837  | -449                    | Klf7       | 61                        |
| chr1 | 67122874  | -192                    | Cps1       | 132                       |
| chr1 | 74361766  | -342                    | Gm216      | 59                        |
| chr1 | 74935618  | -20                     | Ccdc108    | 209                       |
| chr1 | 75210537  | -292                    | Stk16      | 205                       |
| chr1 | 79761786  | -18                     | Wdfy1      | 137                       |
| chr1 | 82316491  | -88                     | Rhbdd1     | 256                       |
| chr1 | 88205802  | -55                     | Dnajb3     | 31                        |
| chr1 | 90914899  | -201                    | Mlph       | 203                       |
| chr1 | 90969656  | -37                     | Rab17      | 105                       |
| chr1 | 91459348  | -21                     | Per2       | 494                       |
| chr1 | 91459679  | -352                    | Per2       | 163                       |
| chr1 | 92933956  | -452                    | Capn10     | 192                       |
| chr1 | 93373496  | -400                    | Ano7       | 308                       |
| chr1 | 93635913  | -187                    | Stk25      | 23                        |
| chr1 | 93635993  | -267                    | Stk25      | 103                       |
| chr1 | 97662216  | -199                    | D1Ertd622e | 110                       |
| chr1 | 105989923 | -483                    | Zcchc2     | 1                         |
| chr1 | 120265452 | -173                    | Steap3     | 187                       |
| chr1 | 133270128 | -321                    | Gm19461    | 2                         |
| chr1 | 133753780 | -34                     | Atp2b4     | 25                        |

|       |           |      |            |     |
|-------|-----------|------|------------|-----|
| chr1  | 135168044 | -364 | Gpr37l1    | 45  |
| chr1  | 135258959 | -488 | Elf3       | 178 |
| chr1  | 135840472 | -389 | Tnnt2      | 236 |
| chr1  | 136467801 | -157 | Kif14      | 6   |
| chr1  | 136467904 | -54  | Kif14      | 2   |
| chr1  | 146495659 | -7   | Fam5c      | 52  |
| chr1  | 152625188 | -78  | Rgl1       | 102 |
| chr1  | 160043996 | -384 | 4930523C07 | 27  |
| chr1  | 161071260 | 368  | Cenpl      | 180 |
| chr1  | 162866716 | -169 | Fmo1       | 198 |
| chr1  | 163313847 | -198 | Prrx1      | 87  |
| chr1  | 164935710 | -201 | Xcl1       | 126 |
| chr1  | 167349975 | -16  | Aldh9a1    | 175 |
| chr1  | 170306374 | -43  | Gm7694     | 208 |
| chr1  | 170976204 | -134 | Fcgr2b     | 186 |
| chr1  | 171196556 | -289 | Pcp4l1     | 381 |
| chr1  | 171346080 | 381  | Pfdn2      | 28  |
| chr1  | 180246422 | -473 | Psen2      | 24  |
| chr1  | 180256398 | -99  | Psen2      | 355 |
| chr1  | 184732639 | -147 | Hlx        | 109 |
| chr1  | 187623900 | -335 | Mir5111    | 119 |
| chr1  | 187623909 | -326 | Mir5111    | 128 |
| chr1  | 189688236 | -151 | Cenpf      | 434 |
| chr1  | 190924995 | -113 | Angel2     | 65  |
| chr10 | 4433099   | 494  | 1700052N19 | 303 |
| chr10 | 10605626  | -319 | Gm5177     | 17  |
| chr10 | 19015460  | -51  | Tnfaip3    | 176 |
| chr10 | 24869635  | -351 | Med23      | 152 |
| chr10 | 28923617  | -111 | 4930519F09 | 103 |
| chr10 | 39163895  | -102 | Wisp3      | 21  |
| chr10 | 41490355  | -84  | Ppil6      | 444 |
| chr10 | 44359649  | -27  | Mir1929    | 20  |
| chr10 | 59403563  | -122 | Pla2g12b   | 41  |
| chr10 | 60283988  | -473 | Psap       | 174 |
| chr10 | 61031186  | -117 | 4930565A17 | 418 |
| chr10 | 61695405  | -109 | Tysnd1     | 380 |
| chr10 | 61784286  | -423 | H2afy2     | 116 |
| chr10 | 62450120  | -428 | Supv3l1    | 9   |
| chr10 | 63339178  | -144 | Sirt1      | 419 |
| chr10 | 63386075  | -488 | Dnajc12    | 103 |
| chr10 | 75060403  | -493 | Bcr        | 6   |
| chr10 | 75781535  | -122 | Gstt3      | 123 |

|       |           |      |             |     |
|-------|-----------|------|-------------|-----|
| chr10 | 75822778  | -236 | Gstt4       | 378 |
| chr10 | 76449075  | -6   | 2610028H24  | 87  |
| chr10 | 76726352  | -309 | Col6a1      | 142 |
| chr10 | 77581638  | -129 | Pttg1ip     | 482 |
| chr10 | 79017294  | -30  | Olfr1351    | 201 |
| chr10 | 79614514  | -490 | C2cd4c      | 108 |
| chr10 | 79688559  | -461 | Gzmm        | 5   |
| chr10 | 80826326  | -330 | Oaz1        | 52  |
| chr10 | 81230949  | -171 | Atcay       | 184 |
| chr10 | 81230955  | -177 | Atcay       | 178 |
| chr10 | 82492684  | -67  | Gm1553      | 104 |
| chr10 | 83722562  | -303 | 1500009L16F | 6   |
| chr10 | 85185147  | -94  | Cry1        | 97  |
| chr10 | 87858744  | -312 | Igf1        | 80  |
| chr10 | 88504423  | -454 | Chpt1       | 29  |
| chr10 | 88826816  | -3   | Utp20       | 116 |
| chr10 | 91082851  | -188 | Ikbip       | 273 |
| chr10 | 93831095  | -460 | Usp44       | 372 |
| chr10 | 93891372  | -171 | Metap2      | 110 |
| chr10 | 95502003  | -77  | Mrpl42      | 269 |
| chr10 | 96616717  | -284 | Btg1        | 323 |
| chr10 | 99759406  | 251  | Csl         | 69  |
| chr10 | 101681175 | -312 | Mgat4c      | 203 |
| chr10 | 110745008 | -457 | E2f7        | 99  |
| chr10 | 115385205 | 246  | Zfc3h1      | 9   |
| chr10 | 116176886 | -372 | Ptprr       | 320 |
| chr10 | 116581912 | -402 | Cnot2       | 435 |
| chr10 | 117045057 | -284 | Lrrc10      | 469 |
| chr10 | 121626601 | -286 | Xpot        | 171 |
| chr10 | 127739295 | -243 | Zbtb39      | 46  |
| chr10 | 128083606 | 299  | Atp5b       | 86  |
| chr10 | 128589778 | -278 | ErbB3       | 118 |
| chr10 | 128821573 | -198 | Sarnp       | 124 |
| chr10 | 129112500 | -78  | Olfr769     | 226 |
| chr11 | 4257152   | -416 | Lif         | 46  |
| chr11 | 4627788   | -23  | Gm11961     | 421 |
| chr11 | 4873969   | -34  | Nipsnap1    | 490 |
| chr11 | 6559814   | -369 | Ccm2        | 187 |
| chr11 | 7214137   | -215 | Igfbp3      | 280 |
| chr11 | 16257391  | -333 | Vstm2a      | 81  |
| chr11 | 16951632  | 222  | Fbxo48      | 107 |
| chr11 | 29172626  | -281 | Smek2       | 241 |

|       |          |      |             |     |
|-------|----------|------|-------------|-----|
| chr11 | 44519037 | 73   | Rnf145      | 147 |
| chr11 | 49086709 | -346 | Ifi47       | 91  |
| chr11 | 51635915 | -20  | Rmnd5b      | 38  |
| chr11 | 53120196 | -141 | Gm11186     | 404 |
| chr11 | 53456993 | -212 | Shroom1     | 64  |
| chr11 | 54819483 | -436 | LOC432562   | 492 |
| chr11 | 55204144 | -196 | Slc36a1     | 363 |
| chr11 | 55312681 | -425 | Fat2        | 132 |
| chr11 | 58456186 | -207 | Olfr30      | 105 |
| chr11 | 58535207 | -383 | Olfr330     | 218 |
| chr11 | 58683584 | -291 | Olfr320     | 243 |
| chr11 | 58802146 | -187 | Fam183b     | 308 |
| chr11 | 58802198 | -239 | Fam183b     | 360 |
| chr11 | 59506816 | -177 | Zkscan17    | 3   |
| chr11 | 59571766 | -29  | Olfr222     | 195 |
| chr11 | 60139906 | -176 | Rai1        | 336 |
| chr11 | 61855130 | -39  | Ulk2        | 227 |
| chr11 | 62457977 | -483 | Pigl        | 185 |
| chr11 | 63131064 | -446 | Pmp22       | 21  |
| chr11 | 63131317 | -193 | Pmp22       | 232 |
| chr11 | 66168986 | -436 | Dnahc9      | 253 |
| chr11 | 68991071 | -394 | Mir3062     | 26  |
| chr11 | 69921016 | 68   | Eif5a       | 398 |
| chr11 | 70213588 | -322 | Slc16a11    | 159 |
| chr11 | 70239987 | -136 | Rnasek      | 132 |
| chr11 | 70540133 | -31  | Pld2        | 102 |
| chr11 | 71019370 | -241 | Mis12       | 171 |
| chr11 | 74054908 | -131 | Olfr399     | 156 |
| chr11 | 74268957 | -434 | Olfr406-ps  | 142 |
| chr11 | 79255036 | -342 | Wsb1        | 357 |
| chr11 | 79711539 | -430 | Mir193      | 420 |
| chr11 | 79711546 | -423 | Mir193      | 427 |
| chr11 | 81153058 | -156 | Accn1       | 150 |
| chr11 | 82057594 | -238 | Ccl11       | 98  |
| chr11 | 82911103 | -150 | Unc45b      | 50  |
| chr11 | 82911228 | -25  | Unc45b      | 175 |
| chr11 | 83437484 | -210 | 1700020L24F | 158 |
| chr11 | 84525638 | -22  | 1500016L03F | 43  |
| chr11 | 84870979 | -242 | Ggnbp2      | 81  |
| chr11 | 87890166 | -273 | Olfr462     | 15  |
| chr11 | 88852001 | -499 | Akap1       | 122 |
| chr11 | 90638512 | 328  | Cox11       | 143 |

|       |           |      |            |     |
|-------|-----------|------|------------|-----|
| chr11 | 96024347  | -198 | Gip        | 206 |
| chr11 | 96024350  | -195 | Gip        | 203 |
| chr11 | 96317455  | 290  | Mir10a     | 259 |
| chr11 | 97702970  | -464 | Psmb3      | 17  |
| chr11 | 97782034  | -269 | Snora21    | 286 |
| chr11 | 98664043  | -308 | Gsdma      | 375 |
| chr11 | 100016660 | -449 | Krt33a     | 242 |
| chr11 | 100261097 | -109 | Krt17      | 424 |
| chr11 | 101226929 | -480 | Ezh1       | 197 |
| chr11 | 101665467 | -74  | Arl4d      | 249 |
| chr11 | 102836223 | -73  | Higd1b     | 78  |
| chr11 | 108682254 | -355 | Ccdc46     | 77  |
| chr11 | 109543225 | -486 | Arsg       | 43  |
| chr11 | 114796266 | -375 | Btbd17     | 337 |
| chr11 | 115062444 | -407 | Cd300e     | 35  |
| chr11 | 115306774 | -389 | Otop2      | 164 |
| chr11 | 115514380 | -11  | Hn1        | 86  |
| chr11 | 115814849 | 110  | Tsen54     | 182 |
| chr11 | 116078244 | -284 | Unc13d     | 273 |
| chr11 | 116454682 | -336 | Qrich2     | 94  |
| chr11 | 116843743 | 228  | 1110005A03 | 488 |
| chr11 | 117809343 | -324 | Syngn2     | 128 |
| chr11 | 117809586 | -81  | Syngn2     | 115 |
| chr11 | 120467942 | 307  | Hgs        | 109 |
| chr11 | 120551626 | -495 | Ppp1r27    | 9   |
| chr11 | 121204345 | -88  | Hexdc      | 134 |
| chr11 | 121204347 | -86  | Hexdc      | 132 |
| chr12 | 4874498   | -140 | Mfsd2b     | 105 |
| chr12 | 11150696  | 145  | Kcns3      | 357 |
| chr12 | 28623323  | -34  | Colec11    | 379 |
| chr12 | 30883972  | -352 | Fam150b    | 488 |
| chr12 | 38783537  | -174 | Etv1       | 287 |
| chr12 | 55598786  | -131 | Insm2      | 7   |
| chr12 | 55598812  | -105 | Insm2      | 33  |
| chr12 | 59066717  | -202 | Pnn        | 4   |
| chr12 | 69241798  | -34  | Klhdc1     | 453 |
| chr12 | 79028847  | -316 | Plekhh1    | 218 |
| chr12 | 79208535  | -379 | Rdh12      | 135 |
| chr12 | 80133288  | -445 | 2310015A10 | 363 |
| chr12 | 84285108  | -188 | Ptgr2      | 88  |
| chr12 | 84569694  | -158 | Vsx2       | 357 |
| chr12 | 84773115  | -155 | Isca2      | 270 |

|       |           |      |             |     |
|-------|-----------|------|-------------|-----|
| chr12 | 85219136  | -377 | Eif2b2      | 81  |
| chr12 | 85219267  | -246 | Eif2b2      | 212 |
| chr12 | 85219330  | -183 | Eif2b2      | 274 |
| chr12 | 85280845  | -411 | Acyp1       | 287 |
| chr12 | 85746510  | -29  | Mfsd7c      | 51  |
| chr12 | 95692005  | -221 | Flrt2       | 220 |
| chr12 | 98268161  | -496 | Gpr65       | 18  |
| chr12 | 98268512  | -145 | Gpr65       | 31  |
| chr12 | 100187535 | -433 | Gm10433     | 101 |
| chr12 | 100276461 | -148 | Gm10432     | 115 |
| chr12 | 100725183 | -156 | Rps6ka5     | 286 |
| chr12 | 102948857 | -2   | Unc79       | 221 |
| chr12 | 104262764 | -358 | Serpina3i   | 375 |
| chr12 | 108179612 | -126 | Ccnk        | 120 |
| chr12 | 109594050 | -456 | Mir434      | 430 |
| chr12 | 109713298 | -183 | Mir329      | 10  |
| chr12 | 110993992 | -406 | 6030440G07  | 146 |
| chr12 | 111377749 | -32  | Cdc42bpb    | 2   |
| chr12 | 111971141 | -418 | Tdrd9       | 157 |
| chr12 | 117337024 | -13  | Gm5441      | 148 |
| chr13 | 3634013   | -63  | Asb13       | 225 |
| chr13 | 4523505   | -173 | Akr1c20     | 444 |
| chr13 | 9765429   | -116 | Zmynd11     | 96  |
| chr13 | 12107051  | -107 | Ryr2        | 330 |
| chr13 | 19697826  | -67  | Txndc3      | 14  |
| chr13 | 21073713  | -415 | Olfr1370    | 10  |
| chr13 | 21783669  | -273 | Hist1h3i    | 250 |
| chr13 | 23571071  | -329 | Hist1h2bg   | 150 |
| chr13 | 24614214  | -396 | Fam65b      | 212 |
| chr13 | 27390893  | -48  | Prl2b1      | 42  |
| chr13 | 31557709  | -461 | Foxq1       | 90  |
| chr13 | 41605883  | -333 | Tmem170b    | 408 |
| chr13 | 41649459  | 16   | Gm5082      | 240 |
| chr13 | 41847851  | -236 | 9530008L14F | 209 |
| chr13 | 45389376  | -366 | Mylip       | 70  |
| chr13 | 45389540  | -202 | Mylip       | 94  |
| chr13 | 48274021  | -138 | A330048O09  | 454 |
| chr13 | 49607647  | -424 | Ogn         | 186 |
| chr13 | 54766730  | -291 | Sncb        | 97  |
| chr13 | 56482406  | -161 | Il9         | 465 |
| chr13 | 58806811  | 215  | Ntrk2       | 113 |
| chr13 | 60029570  | -141 | A530065N20  | 288 |

|       |           |      |            |     |
|-------|-----------|------|------------|-----|
| chr13 | 60601692  | -255 | Dapk1      | 96  |
| chr13 | 61358571  | -402 | Cts7       | 145 |
| chr13 | 73937667  | -171 | Brd9       | 8   |
| chr13 | 75089919  | -68  | Pcsk1      | 337 |
| chr13 | 94057770  | -26  | Lhfpl2     | 37  |
| chr13 | 96388136  | -158 | Poc5       | 386 |
| chr13 | 98263353  | 111  | Ankra2     | 39  |
| chr13 | 98984724  | -160 | 1700024P04 | 287 |
| chr13 | 99345275  | 489  | Mrps27     | 114 |
| chr13 | 100833885 | -459 | Slc30a5    | 468 |
| chr13 | 100833920 | -494 | Slc30a5    | 433 |
| chr13 | 112993567 | -301 | Gm6320     | 428 |
| chr13 | 119488369 | 14   | 3110070M22 | 183 |
| chr14 | 13284521  | -259 | Synpr      | 106 |
| chr14 | 13670765  | -111 | Sntn       | 324 |
| chr14 | 17981627  | -17  | Thrb       | 490 |
| chr14 | 19824069  | -247 | 2700060E02 | 39  |
| chr14 | 20269339  | -178 | Kcnk16     | 122 |
| chr14 | 20389013  | -104 | Dnajc9     | 489 |
| chr14 | 20393681  | -127 | Mrps16     | 31  |
| chr14 | 21499776  | 6    | Myst4      | 331 |
| chr14 | 24490668  | -13  | Rps24      | 123 |
| chr14 | 25143593  | -353 | 4930572O13 | 462 |
| chr14 | 30548940  | -209 | Tkt        | 394 |
| chr14 | 30715164  | -3   | Sfmbt1     | 31  |
| chr14 | 30715317  | 150  | Sfmbt1     | 122 |
| chr14 | 32466186  | -278 | Chat       | 6   |
| chr14 | 33953752  | -270 | Rbp3       | 444 |
| chr14 | 36935703  | -136 | Gcap14     | 266 |
| chr14 | 38898147  | -155 | 4930529F24 | 49  |
| chr14 | 41069290  | -217 | Dydc2      | 101 |
| chr14 | 45219927  | 210  | Gpr137c    | 305 |
| chr14 | 50681852  | -208 | Olfr747    | 229 |
| chr14 | 52016822  | -43  | G630016D24 | 379 |
| chr14 | 52068989  | -326 | Snord58b   | 201 |
| chr14 | 52104298  | -271 | Hnrnpc     | 265 |
| chr14 | 52104342  | -315 | Hnrnpc     | 221 |
| chr14 | 52110597  | -306 | Rpgrip1    | 41  |
| chr14 | 52495798  | -104 | Olfr1507   | 217 |
| chr14 | 55591376  | -414 | Rnf31      | 89  |
| chr14 | 55900551  | -320 | Sdr39u1    | 135 |
| chr14 | 60264840  | -365 | Mtmr6      | 159 |

|       |           |      |            |     |
|-------|-----------|------|------------|-----|
| chr14 | 60264879  | -326 | Mtmr6      | 120 |
| chr14 | 60378240  | -46  | Fam123a    | 9   |
| chr14 | 60378258  | -28  | Fam123a    | 27  |
| chr14 | 61309689  | -64  | Arl11      | 255 |
| chr14 | 62837381  | -309 | Wdfy2      | 461 |
| chr14 | 63177949  | -157 | Fdft1      | 250 |
| chr14 | 63436134  | -260 | Fam167a    | 50  |
| chr14 | 65593364  | -253 | Elp3       | 283 |
| chr14 | 65954035  | -292 | Scara3     | 350 |
| chr14 | 69708065  | -486 | R3hcc1     | 72  |
| chr14 | 70289689  | -241 | Ppp3cc     | 134 |
| chr14 | 70289887  | -439 | Ppp3cc     | 332 |
| chr14 | 70457348  | -169 | Phyhip     | 88  |
| chr14 | 70628637  | 409  | Epb4.9     | 46  |
| chr14 | 75592780  | 335  | Spert      | 277 |
| chr14 | 75754567  | -75  | Cog3       | 257 |
| chr14 | 79302120  | -486 | 1190002H23 | 343 |
| chr14 | 101729598 | -330 | Lmo7       | 154 |
| chr14 | 101729625 | -303 | Lmo7       | 181 |
| chr14 | 118854907 | -43  | Cldn10     | 48  |
| chr14 | 121738966 | -38  | Dock9      | 126 |
| chr14 | 122983482 | -222 | Tmtc4      | 455 |
| chr14 | 123168833 | 330  | AA536875   | 326 |
| chr15 | 7129359   | -213 | Lifr       | 428 |
| chr15 | 12824878  | 63   | Drosha     | 117 |
| chr15 | 34082574  | -145 | Mtdh       | 133 |
| chr15 | 34237909  | -117 | Laptm4b    | 374 |
| chr15 | 34674812  | -261 | 4930413F20 | 213 |
| chr15 | 34674900  | -173 | 4930413F20 | 125 |
| chr15 | 55090550  | -73  | Dscc1      | 280 |
| chr15 | 75616633  | -52  | Zfp41      | 137 |
| chr15 | 76243915  | -476 | Parp10     | 100 |
| chr15 | 76294309  | -125 | Gm10345    | 319 |
| chr15 | 78718471  | -359 | Elfn2      | 50  |
| chr15 | 79505735  | -495 | Kcnj4      | 392 |
| chr15 | 80078844  | -266 | Snord83b   | 82  |
| chr15 | 80173320  | -401 | Mgat3      | 438 |
| chr15 | 80233963  | -117 | Smcr7l     | 406 |
| chr15 | 82127828  | -94  | Ccdc134    | 64  |
| chr15 | 82354423  | -133 | Ndufa6     | 30  |
| chr15 | 82794641  | -397 | Cyp2d26    | 61  |
| chr15 | 83172493  | -286 | Cyb5r3     | 436 |



|       |           |      |             |     |
|-------|-----------|------|-------------|-----|
| chr15 | 83936526  | -432 | Efcab6      | 20  |
| chr15 | 85017070  | -71  | Upk3a       | 40  |
| chr15 | 85580731  | -411 | AU022754    | 122 |
| chr15 | 85735411  | -153 | Ppara       | 405 |
| chr15 | 88734495  | -277 | Brd1        | 117 |
| chr15 | 89141128  | -426 | Mapk12      | 108 |
| chr15 | 89374065  | -248 | Sco2        | 161 |
| chr15 | 91050093  | -146 | Kif21a      | 221 |
| chr15 | 91838324  | -2   | Muc19       | 167 |
| chr15 | 97706225  | -404 | Rpap3       | 193 |
| chr15 | 97731509  | -105 | Endou       | 106 |
| chr15 | 98221476  | -421 | Olfr287     | 42  |
| chr15 | 98898902  | -363 | Dhh         | 98  |
| chr15 | 98899019  | -480 | Dhh         | 19  |
| chr15 | 99875480  | -25  | Lima1       | 199 |
| chr15 | 100423545 | 352  | Gm5475      | 356 |
| chr15 | 101284196 | -105 | 9430023L20F | 202 |
| chr15 | 101503546 | -270 | Gm6042      | 273 |
| chr15 | 102208047 | -220 | Zfp740      | 0   |
| chr16 | 3909115   | 106  | Cluap1      | 76  |
| chr16 | 4719308   | -250 | Nmral1      | 175 |
| chr16 | 5013709   | -157 | Rogdi       | 364 |
| chr16 | 8512976   | -453 | Abat        | 89  |
| chr16 | 8638083   | 376  | Pmm2        | 251 |
| chr16 | 11065896  | -402 | Snn         | 438 |
| chr16 | 11909506  | -84  | Cpped1      | 30  |
| chr16 | 14291801  | -394 | Myh11       | 82  |
| chr16 | 14906631  | -15  | Efcab1      | 101 |
| chr16 | 17124252  | -111 | Mir130b     | 55  |
| chr16 | 17561957  | 72   | P2rx6       | 386 |
| chr16 | 18327522  | -58  | Mir185      | 48  |
| chr16 | 20516818  | -246 | Dvl3        | 392 |
| chr16 | 29578948  | -386 | Opa1        | 171 |
| chr16 | 30064868  | -489 | Hes1        | 473 |
| chr16 | 32099594  | -208 | 1500031L02F | 108 |
| chr16 | 32247170  | -57  | Wdr53       | 74  |
| chr16 | 32247309  | 56   | Wdr53       | 12  |
| chr16 | 32735752  | -134 | Muc4        | 228 |
| chr16 | 33380352  | -423 | Zfp148      | 51  |
| chr16 | 33967500  | -498 | Umps        | 328 |
| chr16 | 35509774  | -356 | 1600019K03F | 403 |
| chr16 | 37916248  | -248 | Gpr156      | 90  |

|       |          |      |            |     |
|-------|----------|------|------------|-----|
| chr16 | 44746414 | -52  | Gtpbp8     | 187 |
| chr16 | 44943304 | -374 | Cd200r3    | 15  |
| chr16 | 50732963 | -191 | 5330426P16 | 13  |
| chr16 | 56075104 | -305 | Senp7      | 136 |
| chr16 | 56886167 | -5   | Tmem45a    | 260 |
| chr16 | 58995046 | -358 | Olfr183    | 110 |
| chr16 | 59303016 | -139 | Olfr203    | 397 |
| chr16 | 76373273 | -225 | Nrip1      | 41  |
| chr16 | 89975024 | -326 | Tiam1      | 202 |
| chr16 | 92400501 | -425 | Rcan1      | 242 |
| chr16 | 93358753 | -42  | 1810053B23 | 386 |
| chr16 | 94328149 | -273 | Ripply3    | 77  |
| chr16 | 97356329 | -399 | Bace2      | 179 |
| chr17 | 5440535  | -276 | 5730437N04 | 79  |
| chr17 | 6138084  | -64  | Tulp4      | 460 |
| chr17 | 13220783 | -405 | Smok2a     | 137 |
| chr17 | 15241225 | -443 | Gm5091     | 14  |
| chr17 | 17064041 | -62  | Zfp960     | 2   |
| chr17 | 20285445 | -16  | Vmn2r106   | 384 |
| chr17 | 20891140 | -490 | Vmn1r231   | 16  |
| chr17 | 21733225 | -499 | Zfp229     | 282 |
| chr17 | 23600403 | -453 | Zscan10    | 352 |
| chr17 | 23601166 | 310  | Zscan10    | 247 |
| chr17 | 23601180 | 324  | Zscan10    | 261 |
| chr17 | 24169511 | -83  | Atp6v0c    | 153 |
| chr17 | 24632708 | 26   | Nthl1      | 5   |
| chr17 | 24695913 | -321 | Noxo1      | 262 |
| chr17 | 24727590 | -239 | Rpl3l      | 173 |
| chr17 | 24727694 | -135 | Rpl3l      | 106 |
| chr17 | 24895550 | 430  | Mrps34     | 393 |
| chr17 | 24895569 | 449  | Mrps34     | 374 |
| chr17 | 25133126 | -268 | Cln7       | 97  |
| chr17 | 26022093 | -234 | Rab11fip3  | 178 |
| chr17 | 28080926 | -288 | Tcp11      | 9   |
| chr17 | 28328220 | -251 | Rpl10a     | 97  |
| chr17 | 28549253 | -234 | Gm749      | 126 |
| chr17 | 29318462 | -420 | Pi16       | 26  |
| chr17 | 30954229 | -454 | Umodl1     | 165 |
| chr17 | 32917133 | -47  | Cyp4f14    | 332 |
| chr17 | 33139919 | -237 | Morc2b     | 90  |
| chr17 | 34325540 | -135 | H2-Eb2     | 91  |
| chr17 | 35649675 | -33  | Sfta2      | 145 |

|       |          |      |             |     |
|-------|----------|------|-------------|-----|
| chr17 | 35703922 | 216  | Ddr1        | 50  |
| chr17 | 35771971 | -479 | 4833427F10F | 50  |
| chr17 | 35897757 | -380 | 2310061I04R | 91  |
| chr17 | 37445367 | -113 | Olfr108     | 388 |
| chr17 | 37768411 | -231 | Olfr122     | 82  |
| chr17 | 37768599 | -43  | Olfr122     | 52  |
| chr17 | 38131543 | -354 | Olfr132     | 214 |
| chr17 | 38131658 | -469 | Olfr132     | 99  |
| chr17 | 38420608 | -424 | Gm20408     | 55  |
| chr17 | 38639000 | -447 | Gm20516     | 116 |
| chr17 | 44188402 | -170 | Clic5       | 147 |
| chr17 | 45433859 | -153 | Cdc5l       | 200 |
| chr17 | 46327712 | 310  | Abcc10      | 402 |
| chr17 | 46711305 | -158 | Pex6        | 412 |
| chr17 | 47611501 | -95  | Med20       | 168 |
| chr17 | 47630242 | -448 | Usp49       | 83  |
| chr17 | 48316145 | -17  | B430306N03  | 104 |
| chr17 | 53991099 | -469 | Sult1c1     | 494 |
| chr17 | 55945551 | -293 | Zfp119b     | 261 |
| chr17 | 56303056 | -281 | Uhrf1       | 196 |
| chr17 | 56303563 | 226  | Uhrf1       | 102 |
| chr17 | 56512384 | 98   | Znrf4       | 11  |
| chr17 | 56628036 | -107 | Tmem146     | 117 |
| chr17 | 69416171 | -276 | C030034I22R | 296 |
| chr17 | 70424488 | -304 | Dlgap1      | 109 |
| chr17 | 71475475 | -133 | Smchd1      | 334 |
| chr17 | 74316629 | -197 | Dpy30       | 74  |
| chr17 | 75005372 | -157 | Ltbp1       | 117 |
| chr17 | 75005422 | -107 | Ltbp1       | 67  |
| chr17 | 78936703 | -432 | 2410091C18  | 256 |
| chr17 | 84973767 | -285 | Ppm1b       | 212 |
| chr17 | 87025696 | 135  | Cript       | 252 |
| chr17 | 89379076 | -165 | Gm4719      | 159 |
| chr17 | 94750123 | 23   | 2700099C18  | 127 |
| chr18 | 3337803  | -215 | Crem        | 192 |
| chr18 | 10785385 | -61  | Mir1b       | 188 |
| chr18 | 10785390 | -56  | Mir1b       | 193 |
| chr18 | 10785429 | -17  | Mir1b       | 232 |
| chr18 | 20665235 | -15  | Ttr         | 119 |
| chr18 | 21001327 | -14  | Rnf138      | 376 |
| chr18 | 37143891 | -78  | Pcdhac2     | 287 |
| chr18 | 37806291 | -119 | Pcdhgc3     | 132 |

|       |          |      |            |     |
|-------|----------|------|------------|-----|
| chr18 | 37998600 | 368  | Arap3      | 107 |
| chr18 | 38339039 | -47  | Gnpda1     | 156 |
| chr18 | 38418854 | -121 | Ndfip1     | 216 |
| chr18 | 44027616 | -253 | Spink14    | 121 |
| chr18 | 44661355 | -310 | A930012L18 | 184 |
| chr18 | 46212609 | -3   | Trim36     | 474 |
| chr18 | 46212645 | -39  | Trim36     | 438 |
| chr18 | 46574872 | -340 | Ticam2     | 14  |
| chr18 | 46958746 | -130 | Comm10     | 33  |
| chr18 | 48045067 | -268 | Gm5506     | 9   |
| chr18 | 48045269 | -66  | Gm5506     | 193 |
| chr18 | 56925600 | -53  | 3-Mar      | 60  |
| chr18 | 61044703 | -447 | Pdgfrb     | 277 |
| chr18 | 63692475 | -117 | Txn1       | 331 |
| chr18 | 65023059 | -468 | Nedd4l     | 144 |
| chr18 | 65023205 | -322 | Nedd4l     | 2   |
| chr18 | 72351397 | -329 | Dcc        | 54  |
| chr18 | 75018274 | -498 | Dym        | 71  |
| chr18 | 78142593 | -475 | Slc14a1    | 84  |
| chr18 | 80364320 | -67  | Kcng2      | 51  |
| chr18 | 84088331 | 173  | Zadh2      | 165 |
| chr18 | 84934596 | -429 | Fbxo15     | 171 |
| chr19 | 4854653  | -476 | Ctsf       | 170 |
| chr19 | 4878682  | -8   | Zdhhc24    | 34  |
| chr19 | 4928344  | -58  | Dpp3       | 206 |
| chr19 | 5297914  | -417 | Gal3st3    | 71  |
| chr19 | 5637342  | -148 | Rela       | 75  |
| chr19 | 5637459  | -31  | Rela       | 42  |
| chr19 | 6068086  | -237 | Tm7sf2     | 67  |
| chr19 | 6085501  | 404  | Cdca5      | 46  |
| chr19 | 8592811  | -371 | Slc22a8    | 10  |
| chr19 | 11871704 | -491 | Olfr1419   | 21  |
| chr19 | 12282767 | -283 | Olfr1434   | 405 |
| chr19 | 12596622 | -57  | A330040F15 | 71  |
| chr19 | 13095814 | -169 | Olfr1457   | 307 |
| chr19 | 13164957 | -59  | Olfr1461   | 197 |
| chr19 | 13234087 | -165 | Olfr1463   | 13  |
| chr19 | 15924713 | -92  | Psat1      | 296 |
| chr19 | 17393913 | -130 | Rfk        | 184 |
| chr19 | 18670561 | -219 | 2410127L17 | 399 |
| chr19 | 29924857 | -257 | Il33       | 34  |
| chr19 | 30175711 | -294 | Gldc       | 356 |

|       |          |      |            |     |
|-------|----------|------|------------|-----|
| chr19 | 34475416 | -282 | Ch25h      | 334 |
| chr19 | 37434781 | -60  | Hhex       | 108 |
| chr19 | 42752778 | -4   | Pyroxd2    | 83  |
| chr19 | 43986677 | -158 | Cpn1       | 349 |
| chr19 | 46039683 | -63  | Ldb1       | 125 |
| chr19 | 46623018 | -383 | D19Wsu162e | 355 |
| chr19 | 52922787 | -394 | AA387883   | 48  |
| chr19 | 53464953 | -158 | 5830416P10 | 364 |
| chr19 | 55099509 | -63  | Gpam       | 244 |
| chr19 | 57361274 | 265  | Fam160b1   | 119 |
| chr19 | 58670187 | -178 | Pnlip      | 196 |
| chr19 | 59943901 | -248 | Rab11fip2  | 256 |
| chr19 | 60791050 | -358 | Eif3a      | 134 |
| chr2  | 6193226  | -25  | A230108P19 | 455 |
| chr2  | 10475539 | 239  | Mir669k    | 76  |
| chr2  | 10500340 | -482 | Mir467a-4  | 217 |
| chr2  | 11172303 | -79  | Prkcq      | 215 |
| chr2  | 11172347 | -35  | Prkcq      | 171 |
| chr2  | 14873588 | -68  | Cacnb2     | 210 |
| chr2  | 17731553 | -486 | Nebi       | 363 |
| chr2  | 24214981 | -436 | Il1f6      | 257 |
| chr2  | 24975684 | -349 | Pnpla7     | 9   |
| chr2  | 25557480 | -420 | Edf1       | 61  |
| chr2  | 26389461 | 113  | Pmpca      | 55  |
| chr2  | 26583825 | -39  | Egfl7      | 68  |
| chr2  | 30237443 | -326 | Lrrc8a     | 63  |
| chr2  | 30594639 | -405 | Cstad      | 332 |
| chr2  | 30803647 | 16   | 1700001022 | 43  |
| chr2  | 30845009 | -358 | Prrx2      | 52  |
| chr2  | 31152112 | -204 | Gpr107     | 133 |
| chr2  | 31152598 | 282  | Gpr107     | 16  |
| chr2  | 32395690 | -200 | Ptges2     | 438 |
| chr2  | 35621749 | -232 | Dab2ip     | 398 |
| chr2  | 51935236 | -228 | Rbm43      | 194 |
| chr2  | 52339047 | -250 | Neb        | 367 |
| chr2  | 59611845 | -199 | Tanc1      | 87  |
| chr2  | 60553472 | -165 | Pla2r1     | 296 |
| chr2  | 60722704 | -102 | Itgb6      | 118 |
| chr2  | 67445617 | -385 | Xirp2      | 13  |
| chr2  | 69206202 | -13  | Spc25      | 462 |
| chr2  | 69789785 | 48   | Phospho2   | 384 |
| chr2  | 71055324 | -420 | Dcaf17     | 441 |

|      |           |      |            |     |
|------|-----------|------|------------|-----|
| chr2 | 76338839  | -187 | Pde11a     | 74  |
| chr2 | 76338877  | -225 | Pde11a     | 112 |
| chr2 | 76369937  | -47  | Rbm45      | 428 |
| chr2 | 79255394  | -32  | Itga4      | 209 |
| chr2 | 80639182  | -82  | Nup35      | 2   |
| chr2 | 84839649  | 241  | Slc43a1    | 65  |
| chr2 | 84839677  | 269  | Slc43a1    | 93  |
| chr2 | 84839771  | 363  | Slc43a1    | 85  |
| chr2 | 86182490  | -382 | Olfr52     | 178 |
| chr2 | 86255785  | -95  | Olfr1049   | 0   |
| chr2 | 86538932  | -20  | Olfr1079   | 61  |
| chr2 | 87001732  | -200 | Olfr1102   | 153 |
| chr2 | 88035202  | -66  | Olfr73     | 342 |
| chr2 | 88035632  | -496 | Olfr73     | 21  |
| chr2 | 88897938  | -344 | Olfr1208   | 288 |
| chr2 | 89250102  | -411 | Olfr1228   | 169 |
| chr2 | 90253200  | -215 | Olfr142    | 178 |
| chr2 | 93452471  | -348 | Gm10804    | 253 |
| chr2 | 93822602  | -35  | Ext2       | 135 |
| chr2 | 101839214 | -235 | Prr5l      | 113 |
| chr2 | 104590005 | -479 | Cstf3      | 286 |
| chr2 | 104742919 | -119 | Depdc7     | 36  |
| chr2 | 107290372 | -217 | Kcna4      | 122 |
| chr2 | 109692466 | 30   | Bdnf       | 68  |
| chr2 | 110050876 | -398 | 1700024P03 | 33  |
| chr2 | 110305837 | -113 | Bbox1      | 260 |
| chr2 | 110362883 | 109  | Fibin      | 28  |
| chr2 | 110597039 | -260 | Slc5a12    | 364 |
| chr2 | 117121039 | -411 | Spred1     | 104 |
| chr2 | 119208333 | -387 | Zfyve19    | 2   |
| chr2 | 119351010 | -232 | Chac1      | 294 |
| chr2 | 121036940 | -186 | Epb4.2     | 55  |
| chr2 | 121381392 | -453 | Strc       | 293 |
| chr2 | 121956423 | -30  | Ctdspl2    | 30  |
| chr2 | 122781953 | -46  | Sqrdl      | 10  |
| chr2 | 127270214 | -15  | Stard7     | 497 |
| chr2 | 128863777 | -155 | Fbln7      | 401 |
| chr2 | 130424602 | 38   | Fam113a    | 109 |
| chr2 | 130424631 | 9    | Fam113a    | 80  |
| chr2 | 132689818 | -465 | 1110034G24 | 461 |
| chr2 | 132689860 | -423 | 1110034G24 | 419 |
| chr2 | 144368644 | -339 | Gm20571    | 84  |

|      |           |      |             |     |
|------|-----------|------|-------------|-----|
| chr2 | 145785947 | -169 | Rin2        | 11  |
| chr2 | 148047018 | -50  | Foxa2       | 194 |
| chr2 | 148781715 | -294 | 8030411F24  | 484 |
| chr2 | 148875851 | -384 | Cst3        | 471 |
| chr2 | 152490300 | -163 | Defb22      | 120 |
| chr2 | 152490461 | -324 | Defb22      | 281 |
| chr2 | 152580505 | -194 | Defb19      | 433 |
| chr2 | 152623410 | -358 | Defb25      | 499 |
| chr2 | 152686885 | -263 | Mcts2       | 181 |
| chr2 | 153031680 | -172 | Xkr7        | 196 |
| chr2 | 153241588 | 56   | Pofut1      | 371 |
| chr2 | 153780629 | -250 | Efcab8      | 58  |
| chr2 | 154551425 | -351 | 1700007I08R | 57  |
| chr2 | 154613103 | -265 | Zfp341      | 281 |
| chr2 | 155133260 | -221 | Itch        | 99  |
| chr2 | 157204860 | -327 | Rbl1        | 95  |
| chr2 | 158767670 | -429 | Fam83d      | 425 |
| chr2 | 162987044 | -437 | Sgk2        | 217 |
| chr2 | 163054182 | -453 | Mybl2       | 284 |
| chr2 | 163645205 | -63  | Serinc3     | 90  |
| chr2 | 164911948 | -199 | Zfp335      | 294 |
| chr2 | 165035167 | -389 | Ncoa5       | 96  |
| chr2 | 165885167 | -417 | Zmynd8      | 458 |
| chr2 | 170143044 | -370 | Zfp217      | 311 |
| chr2 | 179414716 | -220 | 4930591A17  | 201 |
| chr2 | 180024959 | -28  | Lsm14b      | 266 |
| chr2 | 180042923 | 440  | Ss181       | 150 |
| chr2 | 181314670 | -171 | Stmn3       | 208 |
| chr3 | 10301361  | -179 | Fabp12      | 114 |
| chr3 | 14578562  | -109 | E2f5        | 335 |
| chr3 | 19187248  | -81  | Mtfr1       | 77  |
| chr3 | 19894485  | -386 | 4632415L05F | 111 |
| chr3 | 20155213  | -118 | Gyg         | 343 |
| chr3 | 26637399  | -232 | Spata16     | 440 |
| chr3 | 27896739  | -372 | Tmem212     | 269 |
| chr3 | 27938420  | -260 | Pld1        | 438 |
| chr3 | 30509925  | -439 | Mecom       | 405 |
| chr3 | 35930570  | -497 | Dcun1d1     | 221 |
| chr3 | 36552425  | -181 | Exosc9      | 136 |
| chr3 | 41563942  | 191  | Phf17       | 3   |
| chr3 | 51224005  | -442 | Ccrn4l      | 84  |
| chr3 | 51415709  | -307 | Naa15       | 122 |

|      |           |      |            |     |
|------|-----------|------|------------|-----|
| chr3 | 51483952  | -14  | Rab33b     | 411 |
| chr3 | 51660998  | -195 | Mgst2      | 232 |
| chr3 | 54915918  | -32  | 6030405A18 | 109 |
| chr3 | 69131033  | -200 | Gm1647     | 42  |
| chr3 | 84480907  | -469 | Fhdc1      | 93  |
| chr3 | 86084154  | -280 | Sh3d19     | 371 |
| chr3 | 86084247  | -187 | Sh3d19     | 278 |
| chr3 | 86140568  | 118  | Rnu73b     | 239 |
| chr3 | 87618650  | -101 | Arhgef11   | 448 |
| chr3 | 88410693  | -378 | Pmf1       | 394 |
| chr3 | 88914223  | -274 | Msto1      | 5   |
| chr3 | 90669023  | -48  | S100a8     | 267 |
| chr3 | 90695894  | -204 | S100a9     | 271 |
| chr3 | 92373438  | -477 | Sprr2g     | 101 |
| chr3 | 92670351  | -37  | Lce1a2     | 2   |
| chr3 | 92687509  | -300 | Lce1d      | 265 |
| chr3 | 92687550  | -341 | Lce1d      | 306 |
| chr3 | 92779265  | -367 | Lce1i      | 146 |
| chr3 | 92870335  | -131 | 2310050C09 | 39  |
| chr3 | 92944282  | -204 | Lce3c      | 104 |
| chr3 | 93796148  | -250 | Tdpoz4     | 108 |
| chr3 | 95559196  | -481 | Hormad1    | 274 |
| chr3 | 95904883  | -245 | Car14      | 340 |
| chr3 | 96219993  | 77   | Hist2h2ab  | 109 |
| chr3 | 96629734  | -194 | Rbm8a      | 226 |
| chr3 | 97031960  | -456 | Gja5       | 167 |
| chr3 | 97610285  | -96  | Chd1l      | 496 |
| chr3 | 97628568  | -236 | Fmo5       | 130 |
| chr3 | 97768074  | -61  | Pde4dip    | 131 |
| chr3 | 98724960  | -418 | Hsd3b2     | 207 |
| chr3 | 101022196 | -21  | Cd101      | 202 |
| chr3 | 105458374 | -442 | Kcnd3      | 88  |
| chr3 | 105687771 | -201 | Ddx20      | 105 |
| chr3 | 105687960 | -390 | Ddx20      | 46  |
| chr3 | 106113303 | -79  | Chia       | 50  |
| chr3 | 108739391 | -267 | Aknad1     | 438 |
| chr3 | 111881489 | -414 | Gm6602     | 380 |
| chr3 | 116614810 | -224 | Ccdc76     | 249 |
| chr3 | 116663011 | -335 | Hiat1      | 0   |
| chr3 | 122729066 | -92  | Pde5a      | 229 |
| chr3 | 124581266 | -176 | 1700003H04 | 22  |
| chr3 | 129878378 | -244 | Pla2g12a   | 70  |



|      |           |      |             |     |
|------|-----------|------|-------------|-----|
| chr3 | 135825128 | -363 | Slc39a8     | 99  |
| chr3 | 137623297 | -375 | Ddit4l      | 289 |
| chr3 | 137981620 | -72  | Dapp1       | 140 |
| chr3 | 142764838 | -409 | Gtf2b       | 109 |
| chr3 | 146770575 | 117  | Prkacb      | 44  |
| chr3 | 152395617 | -393 | Zzz3        | 205 |
| chr4 | 16163636  | -474 | A530072M11  | 440 |
| chr4 | 32950915  | -90  | Ankrd6      | 51  |
| chr4 | 41760936  | 493  | Il11ra1     | 310 |
| chr4 | 43957550  | -152 | Glipr2      | 353 |
| chr4 | 43957616  | -86  | Glipr2      | 287 |
| chr4 | 46039019  | -203 | Tmod1       | 40  |
| chr4 | 49059033  | -429 | E130309F12F | 2   |
| chr4 | 49631686  | -374 | Rnf20       | 433 |
| chr4 | 53825823  | -222 | Tmem38b     | 305 |
| chr4 | 56947443  | -15  | D730040F13  | 256 |
| chr4 | 57956834  | -424 | Txn1        | 128 |
| chr4 | 58912843  | -119 | AI314180    | 310 |
| chr4 | 58912873  | -149 | AI314180    | 280 |
| chr4 | 59003185  | -8   | Dnajc25     | 235 |
| chr4 | 62408866  | 83   | Prpf4       | 50  |
| chr4 | 63344178  | -388 | Orm1        | 172 |
| chr4 | 63560299  | -61  | 6330416G13  | 139 |
| chr4 | 70535413  | -486 | Megf9       | 360 |
| chr4 | 82859995  | -335 | Zdhhc21     | 454 |
| chr4 | 88094191  | -439 | BC057079    | 84  |
| chr4 | 88634532  | -347 | C87499      | 193 |
| chr4 | 95967237  | -142 | Hook1       | 38  |
| chr4 | 96141175  | -24  | Cyp2j12     | 474 |
| chr4 | 101716923 | -484 | Lepr        | 116 |
| chr4 | 108719231 | -418 | 3110021N24  | 212 |
| chr4 | 109406841 | -259 | Ttc39a      | 443 |
| chr4 | 113287009 | -37  | Skint6      | 39  |
| chr4 | 116651758 | -85  | Akr1a1      | 134 |
| chr4 | 116708624 | -306 | Ccdc163     | 472 |
| chr4 | 117915078 | -80  | lpo13       | 135 |
| chr4 | 118892911 | -174 | Olf1330     | 177 |
| chr4 | 123343579 | -328 | Bmp8a       | 164 |
| chr4 | 123412192 | -282 | D830031N03  | 267 |
| chr4 | 124714527 | -334 | Sf3a3       | 348 |
| chr4 | 124862533 | -363 | Maneal      | 69  |
| chr4 | 126286400 | -394 | Col8a2      | 27  |

|      |           |      |             |     |
|------|-----------|------|-------------|-----|
| chr4 | 126736355 | -87  | Tfap2e      | 103 |
| chr4 | 132757320 | -150 | Smpdl3b     | 53  |
| chr4 | 133220389 | -420 | Cd164l2     | 107 |
| chr4 | 134287623 | 222  | Pdik1l      | 289 |
| chr4 | 134535388 | -2   | Fam54b      | 241 |
| chr4 | 138725385 | 60   | Pla2g2c     | 313 |
| chr4 | 138914379 | -433 | Otud3       | 105 |
| chr4 | 140742644 | -2   | Padi6       | 132 |
| chr4 | 146514887 | -33  | Gm13247     | 282 |
| chr4 | 148088175 | -112 | Agtrap      | 228 |
| chr4 | 148152129 | 5    | Fbxo6       | 37  |
| chr4 | 148591174 | -339 | Srm         | 55  |
| chr4 | 149308043 | -346 | Kif1b       | 385 |
| chr4 | 149586254 | -384 | Clstn1      | 119 |
| chr4 | 154026224 | -181 | 1190007F08F | 296 |
| chr4 | 155803147 | -471 | Mrpl20      | 104 |
| chr5 | 5749490   | -174 | Steap1      | 87  |
| chr5 | 15883965  | -200 | 4930519H02  | 182 |
| chr5 | 15884017  | -252 | 4930519H02  | 234 |
| chr5 | 17962354  | -216 | Gnat3       | 175 |
| chr5 | 20950926  | -63  | A630072M18  | 447 |
| chr5 | 23851075  | 478  | 2700038G22  | 359 |
| chr5 | 24685474  | -341 | Nub1        | 221 |
| chr5 | 25705833  | -37  | Xrcc2       | 432 |
| chr5 | 30341364  | -299 | Ccdc164     | 192 |
| chr5 | 30465795  | -282 | 1700001C02  | 492 |
| chr5 | 30647865  | -74  | 4930471M23  | 301 |
| chr5 | 30647880  | -59  | 4930471M23  | 316 |
| chr5 | 31192888  | -416 | Snx17       | 25  |
| chr5 | 31251252  | -454 | Krtcap3     | 475 |
| chr5 | 35582664  | -396 | Acox3       | 462 |
| chr5 | 35588781  | -19  | 4931431C16  | 189 |
| chr5 | 36796920  | -167 | Mrfap1      | 123 |
| chr5 | 37735113  | -406 | Cytl1       | 30  |
| chr5 | 38483452  | -68  | Slc2a9      | 333 |
| chr5 | 38561676  | -82  | Wdr1        | 158 |
| chr5 | 44094957  | -190 | Prom1       | 20  |
| chr5 | 49286127  | -469 | Kcnip4      | 180 |
| chr5 | 64159758  | -453 | Tbc1d1      | 46  |
| chr5 | 66098387  | -210 | Rbm47       | 205 |
| chr5 | 73006504  | -400 | Slc10a4     | 254 |
| chr5 | 74195201  | -125 | Rasl11b     | 94  |

|      |           |      |             |     |
|------|-----------|------|-------------|-----|
| chr5 | 76951945  | -368 | Ppat        | 8   |
| chr5 | 86676684  | -387 | Tmprss11bnl | 189 |
| chr5 | 90366620  | -377 | Gm9958      | 114 |
| chr5 | 90366927  | -70  | Gm9958      | 25  |
| chr5 | 90367099  | 102  | Gm9958      | 147 |
| chr5 | 92043060  | -43  | Cdkl2       | 253 |
| chr5 | 92043272  | -255 | Cdkl2       | 41  |
| chr5 | 98254107  | -77  | Fgf5        | 347 |
| chr5 | 100039841 | -153 | Enoph1      | 250 |
| chr5 | 100077943 | -19  | 5830403M04  | 201 |
| chr5 | 103629707 | -305 | Slc10a6     | 82  |
| chr5 | 105699697 | -272 | Lrrc8d      | 112 |
| chr5 | 105699755 | -214 | Lrrc8d      | 170 |
| chr5 | 107330790 | -404 | Brdt        | 87  |
| chr5 | 108065423 | -251 | Mtf2        | 41  |
| chr5 | 108461001 | -331 | Pcgf3       | 296 |
| chr5 | 108630081 | 271  | Tmem175     | 215 |
| chr5 | 108660950 | -182 | Dgkq        | 365 |
| chr5 | 108675876 | -228 | Slc26a1     | 269 |
| chr5 | 109098172 | -309 | Vmn2r12     | 54  |
| chr5 | 110230945 | -59  | Ankle2      | 100 |
| chr5 | 110270345 | -447 | Pgam5       | 356 |
| chr5 | 110343135 | -101 | P2rx2       | 12  |
| chr5 | 110653024 | -427 | Ddx51       | 172 |
| chr5 | 110879662 | -141 | Ttc28       | 113 |
| chr5 | 112326115 | -254 | Tfip11      | 384 |
| chr5 | 114658623 | -203 | Trpv4       | 309 |
| chr5 | 115565034 | -229 | Gcn1l1      | 61  |
| chr5 | 116423108 | -245 | Hspb8       | 177 |
| chr5 | 117389195 | -173 | Rfc5        | 52  |
| chr5 | 117867047 | -72  | Nos1        | 308 |
| chr5 | 117867074 | -45  | Nos1        | 281 |
| chr5 | 120648510 | -312 | Rasal1      | 413 |
| chr5 | 120887736 | -139 | Oas1g       | 9   |
| chr5 | 121503418 | -439 | Adam1b      | 258 |
| chr5 | 121660810 | 224  | Brp         | 378 |
| chr5 | 122900356 | -7   | Kdm2b       | 444 |
| chr5 | 130002953 | -126 | Gusb        | 185 |
| chr5 | 135251305 | -259 | Fzd9        | 219 |
| chr5 | 135632375 | -279 | Rhbdd2      | 359 |
| chr5 | 135744549 | -378 | Tmem120a    | 474 |
| chr5 | 135778159 | -490 | Mdh2        | 230 |

|      |           |      |             |     |
|------|-----------|------|-------------|-----|
| chr5 | 139200206 | -431 | Sun1        | 129 |
| chr5 | 142960291 | -64  | Fscn1       | 290 |
| chr5 | 143403674 | -146 | Kdelr2      | 354 |
| chr5 | 144050892 | -284 | Ocm         | 358 |
| chr5 | 145009724 | -89  | Kpna7       | 122 |
| chr5 | 145167571 | 347  | Cpsf4       | 44  |
| chr5 | 146844704 | -367 | Rasl11a     | 41  |
| chr5 | 147188670 | -26  | Gsx1        | 159 |
| chr5 | 147957253 | -67  | Mtus2       | 347 |
| chr6 | 6865164   | -15  | Dlx6as2     | 86  |
| chr6 | 8192698   | -82  | Col28a1     | 226 |
| chr6 | 8509144   | -452 | Glcci1      | 198 |
| chr6 | 13225379  | -415 | Vwde        | 59  |
| chr6 | 13871509  | -60  | 1110019D14  | 485 |
| chr6 | 17463730  | -227 | Met         | 319 |
| chr6 | 18109145  | -85  | Asz1        | 209 |
| chr6 | 24857803  | -194 | Hyal5       | 43  |
| chr6 | 24955783  | 341  | Tmem229a    | 62  |
| chr6 | 35330700  | -146 | 1700065J11F | 33  |
| chr6 | 39725603  | -141 | Braf        | 329 |
| chr6 | 40325406  | -72  | Agk         | 310 |
| chr6 | 41847154  | -395 | Pip         | 292 |
| chr6 | 48448180  | -49  | Sspo        | 121 |
| chr6 | 48593777  | -106 | Repin1      | 343 |
| chr6 | 51544520  | -3   | Snx10       | 446 |
| chr6 | 52164945  | -115 | Hoxa2       | 4   |
| chr6 | 52165019  | -189 | Hoxa2       | 78  |
| chr6 | 52205051  | -465 | Hoxa5       | 209 |
| chr6 | 57257796  | -353 | Vmn1r15     | 473 |
| chr6 | 57979360  | -59  | Vmn1r25     | 160 |
| chr6 | 72303206  | -42  | Sftpb       | 294 |
| chr6 | 82041562  | -66  | Fam176a     | 179 |
| chr6 | 83742906  | -111 | Atp6v1b1    | 339 |
| chr6 | 87672197  | -30  | Aplf        | 457 |
| chr6 | 88627483  | -39  | Kbtbd12     | 335 |
| chr6 | 88842377  | -477 | Gm15612     | 158 |
| chr6 | 89870663  | -135 | Vmn1r43     | 59  |
| chr6 | 89976110  | -61  | Vmn1r46     | 133 |
| chr6 | 91515612  | -423 | Lsm3        | 27  |
| chr6 | 92535158  | -298 | Prickle2    | 363 |
| chr6 | 97060468  | -58  | Fam19a4     | 285 |
| chr6 | 97617930  | -274 | Frm4b       | 3   |

|      |           |      |            |     |
|------|-----------|------|------------|-----|
| chr6 | 113471022 | -433 | Il17rc     | 123 |
| chr6 | 115853052 | -476 | Ift122     | 344 |
| chr6 | 117907180 | 398  | Hnrnpf     | 93  |
| chr6 | 117907309 | -495 | Hnrnpf     | 36  |
| chr6 | 117907434 | -370 | Hnrnpf     | 161 |
| chr6 | 117907498 | -306 | Hnrnpf     | 225 |
| chr6 | 119174941 | -312 | Dcp1b      | 205 |
| chr6 | 119848521 | 328  | 3110021A11 | 211 |
| chr6 | 120773386 | -382 | Slc25a18   | 104 |
| chr6 | 122952527 | 12   | Clec4a3    | 48  |
| chr6 | 122990270 | -97  | Clec4a4    | 130 |
| chr6 | 124415181 | -115 | Pex5       | 15  |
| chr6 | 124415191 | -125 | Pex5       | 5   |
| chr6 | 124840392 | -118 | Gnb3       | 25  |
| chr6 | 124998590 | -20  | C530028O21 | 23  |
| chr6 | 127149540 | -86  | 9330179D12 | 52  |
| chr6 | 128582069 | -464 | BC048546   | 270 |
| chr6 | 129045866 | -35  | Klrb1f     | 132 |
| chr6 | 131686120 | -377 | Tas2r104   | 344 |
| chr6 | 132315189 | -447 | Prpmp5     | 4   |
| chr6 | 132981037 | -73  | Tas2r109   | 481 |
| chr6 | 133767640 | -238 | Gm5886     | 74  |
| chr6 | 134567353 | -441 | Lrp6       | 284 |
| chr6 | 134898057 | 96   | 2810454H06 | 88  |
| chr6 | 137170279 | 216  | Rerg       | 237 |
| chr6 | 140041611 | 86   | Capza3     | 92  |
| chr6 | 140622717 | 54   | Aebp2      | 38  |
| chr6 | 141340151 | -402 | Gm10400    | 123 |
| chr6 | 143166821 | -409 | Etnk1      | 41  |
| chr6 | 145250568 | 16   | Gm15706    | 195 |
| chr6 | 148444412 | -61  | Tmtc1      | 24  |
| chr7 | 3220340   | -3   | Mir293     | 422 |
| chr7 | 4273804   | -339 | Pira6      | 27  |
| chr7 | 5015669   | 161  | Zfp524     | 276 |
| chr7 | 6363198   | -110 | Zfp78      | 302 |
| chr7 | 7171236   | -117 | Zfp418     | 36  |
| chr7 | 12880848  | -330 | Zfp128     | 186 |
| chr7 | 13623874  | -93  | Sult2a5    | 191 |
| chr7 | 16676058  | -354 | Ceacam15   | 421 |
| chr7 | 18987300  | -224 | Nanos2     | 123 |
| chr7 | 24369859  | -404 | Kcnn4      | 352 |
| chr7 | 24636490  | -80  | Lypd3      | 394 |

|      |           |      |             |     |
|------|-----------|------|-------------|-----|
| chr7 | 24903284  | 298  | Arhgef1     | 202 |
| chr7 | 27674435  | -226 | C030039L03F | 193 |
| chr7 | 28071023  | -213 | Fcgbp       | 65  |
| chr7 | 28129392  | -74  | 9530053A07  | 125 |
| chr7 | 28312255  | -210 | Timm50      | 149 |
| chr7 | 28437864  | 417  | Gmfg        | 302 |
| chr7 | 29170571  | 181  | Ggn         | 153 |
| chr7 | 29180978  | -306 | Psm8        | 50  |
| chr7 | 29282254  | -278 | Spint2      | 199 |
| chr7 | 29282285  | -309 | Spint2      | 168 |
| chr7 | 29815882  | -190 | Zfp790      | 330 |
| chr7 | 30169692  | -230 | Gm5113      | 92  |
| chr7 | 30184120  | -51  | Cox7a1      | 201 |
| chr7 | 30493540  | -118 | Prodh2      | 99  |
| chr7 | 34021209  | -358 | Abpa        | 175 |
| chr7 | 34021228  | -339 | Abpa        | 156 |
| chr7 | 34169027  | -499 | Uba2        | 83  |
| chr7 | 38183164  | -53  | 1600014C10  | 203 |
| chr7 | 39517620  | -146 | Zfp619      | 227 |
| chr7 | 44748881  | 252  | Vrk3        | 206 |
| chr7 | 45717572  | -499 | Rpl18       | 104 |
| chr7 | 45928307  | -91  | Ccdc114     | 144 |
| chr7 | 49778308  | -50  | Prmt3       | 84  |
| chr7 | 55962325  | -206 | A230056P14  | 254 |
| chr7 | 62376510  | -469 | Magel2      | 86  |
| chr7 | 75308273  | -423 | 1500012K07  | 3   |
| chr7 | 75308288  | -408 | 1500012K07  | 18  |
| chr7 | 78895920  | -7   | Aen         | 53  |
| chr7 | 79387090  | -64  | Rlbp1       | 475 |
| chr7 | 79504821  | -443 | Mir9-3      | 65  |
| chr7 | 80024684  | -130 | Zfp710      | 175 |
| chr7 | 82335580  | -114 | Adamts13    | 184 |
| chr7 | 83584838  | -93  | Tmc3        | 5   |
| chr7 | 84528906  | -48  | Gm2115      | 382 |
| chr7 | 85961752  | -271 | Vmn2r74     | 116 |
| chr7 | 86172204  | -481 | Vmn2r75     | 166 |
| chr7 | 89338959  | -173 | Tmem135     | 492 |
| chr7 | 92062265  | -129 | Dlg2        | 39  |
| chr7 | 99766844  | -320 | Olfr521     | 25  |
| chr7 | 100882756 | -348 | Mir3102     | 395 |
| chr7 | 101450305 | -215 | Pde2a       | 465 |
| chr7 | 101556300 | -499 | Art2a-ps    | 91  |

|      |           |      |             |     |
|------|-----------|------|-------------|-----|
| chr7 | 101921074 | -301 | Lrrc51      | 24  |
| chr7 | 103469977 | -64  | Olfr608     | 164 |
| chr7 | 103565627 | -351 | Olfr616     | 62  |
| chr7 | 103565682 | -406 | Olfr616     | 117 |
| chr7 | 103565702 | -426 | Olfr616     | 137 |
| chr7 | 103603292 | -297 | Olfr619     | 427 |
| chr7 | 105338127 | -414 | Olfr691     | 174 |
| chr7 | 105338190 | -477 | Olfr691     | 132 |
| chr7 | 106689923 | -195 | Olfr694     | 185 |
| chr7 | 106886938 | -124 | Olfr706     | 186 |
| chr7 | 107814371 | -215 | Olfr467     | 26  |
| chr7 | 108565983 | -191 | Olfr504     | 240 |
| chr7 | 109083535 | -212 | Ric3        | 235 |
| chr7 | 122219205 | -291 | 2010110P09  | 144 |
| chr7 | 126792914 | -444 | Ppp4c       | 149 |
| chr7 | 126800750 | -304 | Aldoa       | 69  |
| chr7 | 126831922 | -427 | 4930451I11R | 372 |
| chr7 | 127052213 | -237 | Zg16        | 164 |
| chr7 | 127726099 | -484 | Ctf2        | 106 |
| chr7 | 127947035 | -311 | Prss36      | 434 |
| chr7 | 128298168 | -38  | BC017158    | 194 |
| chr7 | 134938745 | -316 | Fam196a     | 260 |
| chr7 | 137437607 | -41  | Glr3        | 33  |
| chr7 | 138845959 | -427 | Ppp2r2d     | 27  |
| chr7 | 139616400 | -72  | E030019B06  | 179 |
| chr7 | 140847867 | -49  | Odf3        | 139 |
| chr7 | 140967806 | -270 | Ifitm1      | 293 |
| chr7 | 141434761 | -168 | Slc25a22    | 54  |
| chr7 | 141448018 | 368  | Rplp2       | 0   |
| chr7 | 141448082 | 432  | Rplp2       | 21  |
| chr7 | 141991901 | -278 | Mir3104     | 339 |
| chr7 | 142680011 | -304 | Ins2        | 315 |
| chr7 | 142900319 | -354 | Th          | 155 |
| chr8 | 13404730  | -351 | Grk1        | 219 |
| chr8 | 13785519  | -96  | Upf3a       | 459 |
| chr8 | 19210054  | -408 | Defa-ps12   | 35  |
| chr8 | 19210105  | -357 | Defa-ps12   | 17  |
| chr8 | 19300345  | -332 | Defa-ps13   | 316 |
| chr8 | 22186216  | -398 | Ckap2       | 217 |
| chr8 | 25602057  | -249 | Whsc111     | 314 |
| chr8 | 36952479  | -38  | Dlc1        | 149 |
| chr8 | 41827255  | -12  | 2810404M03  | 207 |

|      |           |      |             |     |
|------|-----------|------|-------------|-----|
| chr8 | 46551937  | -132 | Mlf1ip      | 171 |
| chr8 | 47675239  | -81  | Ing2        | 290 |
| chr8 | 47714175  | -245 | Cdkn2aip    | 313 |
| chr8 | 47714358  | -428 | Cdkn2aip    | 130 |
| chr8 | 48674817  | -128 | Odz3        | 328 |
| chr8 | 54724796  | -429 | Wdr17       | 304 |
| chr8 | 56294325  | -227 | Hpgd        | 90  |
| chr8 | 61487465  | -269 | Cbr4        | 357 |
| chr8 | 69716723  | 178  | Zfp869      | 483 |
| chr8 | 70042334  | -479 | Sugp1       | 10  |
| chr8 | 70152508  | -270 | Mef2b       | 94  |
| chr8 | 70234486  | -65  | Armc6       | 433 |
| chr8 | 70234852  | -431 | Armc6       | 67  |
| chr8 | 70673033  | -198 | Lsm4        | 179 |
| chr8 | 70754629  | -50  | Rab3a       | 340 |
| chr8 | 72723109  | -179 | Sin3b       | 300 |
| chr8 | 76900383  | -211 | Gm10649     | 117 |
| chr8 | 82402699  | -114 | Il15        | 2   |
| chr8 | 83389747  | -144 | Clgn        | 175 |
| chr8 | 83458409  | -19  | Scoc        | 81  |
| chr8 | 83566655  | -103 | Ndufb7      | 305 |
| chr8 | 83699331  | -153 | Pkn1        | 246 |
| chr8 | 84840742  | -102 | Rad23a      | 52  |
| chr8 | 85059899  | -220 | Fbxw9       | 233 |
| chr8 | 85299362  | -270 | Orc6        | 11  |
| chr8 | 93197889  | -86  | Ces1d       | 446 |
| chr8 | 94771834  | -346 | Cx3cl1      | 74  |
| chr8 | 94857206  | -244 | Polr2c      | 63  |
| chr8 | 104293643 | -463 | Cmtm2a      | 66  |
| chr8 | 105707857 | -446 | 4933405L10P | 53  |
| chr8 | 105708163 | -140 | 4933405L10P | 253 |
| chr8 | 105893114 | -456 | Nrn1l       | 35  |
| chr8 | 107293107 | -363 | Nfat5       | 317 |
| chr8 | 107293294 | -176 | Nfat5       | 455 |
| chr8 | 109962585 | -381 | Marveld3    | 7   |
| chr8 | 110846642 | -382 | Cog4        | 108 |
| chr8 | 111300559 | -338 | Rfwd3       | 278 |
| chr8 | 115707027 | -134 | Maf         | 152 |
| chr8 | 117498215 | -76  | Plcg2       | 99  |
| chr8 | 118283593 | -162 | Cdh13       | 130 |
| chr8 | 122376267 | -349 | Zc3h18      | 150 |
| chr8 | 122433099 | -160 | Cyba        | 164 |



|      |           |      |              |     |
|------|-----------|------|--------------|-----|
| chr8 | 123117079 | -295 | Cpne7        | 64  |
| chr9 | 7502051   | -309 | Mmp10        | 315 |
| chr9 | 13749160  | -21  | Mtmr2        | 236 |
| chr9 | 15302036  | -430 | 4931406C07   | 170 |
| chr9 | 19338250  | -209 | Olfr845      | 210 |
| chr9 | 20171738  | -170 | Olfr870      | 74  |
| chr9 | 21092024  | -17  | Raver1-fdx1l | 272 |
| chr9 | 21496588  | -25  | Mir199a-1    | 41  |
| chr9 | 22003423  | 388  | Prkcsh       | 222 |
| chr9 | 22307750  | -113 | Zfp810       | 107 |
| chr9 | 24097939  | -79  | Npsr1        | 27  |
| chr9 | 24625083  | -102 | Cypt4        | 393 |
| chr9 | 32223782  | -467 | Arhgap32     | 383 |
| chr9 | 35570304  | -236 | Hyls1        | 310 |
| chr9 | 35844322  | -173 | 9230110F15F  | 452 |
| chr9 | 37552821  | -77  | Nrgn         | 444 |
| chr9 | 37854798  | -22  | Olfr877      | 94  |
| chr9 | 38647943  | -422 | Olfr915      | 174 |
| chr9 | 39127951  | -216 | Olfr27       | 294 |
| chr9 | 39128060  | -107 | Olfr27       | 185 |
| chr9 | 39494389  | -402 | Olfr44       | 196 |
| chr9 | 39551209  | -341 | Olfr958      | 81  |
| chr9 | 40964287  | -176 | 4931429I11R  | 279 |
| chr9 | 41376184  | -377 | 3110039I08R  | 282 |
| chr9 | 43259496  | -383 | D630033O11   | 334 |
| chr9 | 45936461  | -404 | Tagln        | 232 |
| chr9 | 45936463  | -406 | Tagln        | 230 |
| chr9 | 48341340  | -443 | Fam55b       | 62  |
| chr9 | 49427038  | -18  | Ankk1        | 146 |
| chr9 | 54301800  | -231 | 1700104A03   | 167 |
| chr9 | 54301909  | -340 | 1700104A03   | 276 |
| chr9 | 59036533  | -93  | Neo1         | 202 |
| chr9 | 59578266  | -71  | Celf6        | 399 |
| chr9 | 59655933  | -435 | Pkm2         | 295 |
| chr9 | 59751555  | 381  | Myo9a        | 128 |
| chr9 | 59950879  | -415 | Gm7616       | 284 |
| chr9 | 61294180  | -372 | B930092H01   | 158 |
| chr9 | 62026962  | -173 | Paqr5        | 127 |
| chr9 | 64281229  | -378 | Tipin        | 222 |
| chr9 | 64341025  | 231  | Dis3l        | 45  |
| chr9 | 65214230  | -460 | Parp16       | 39  |
| chr9 | 67044022  | -152 | Tpm1         | 59  |

|      |           |      |             |     |
|------|-----------|------|-------------|-----|
| chr9 | 71485561  | 421  | Polr2m      | 53  |
| chr9 | 72111983  | -165 | Tcf12       | 89  |
| chr9 | 72985462  | -89  | Ccpg1       | 65  |
| chr9 | 73039785  | 67   | 2310009A05  | 308 |
| chr9 | 73039832  | 114  | 2310009A05  | 261 |
| chr9 | 74953017  | -36  | BC031353    | 408 |
| chr9 | 75441478  | -46  | Leo1        | 300 |
| chr9 | 79978339  | -458 | Filip1      | 259 |
| chr9 | 83806415  | -111 | Elovl4      | 370 |
| chr9 | 83806589  | -285 | Elovl4      | 196 |
| chr9 | 87021870  | -159 | Cyb5r4      | 39  |
| chr9 | 87021874  | -155 | Cyb5r4      | 43  |
| chr9 | 92309321  | -56  | 1700057G04  | 68  |
| chr9 | 98422597  | -364 | Rbp1        | 162 |
| chr9 | 99875687  | 482  | Sox14       | 172 |
| chr9 | 100546196 | -144 | Nck1        | 312 |
| chr9 | 103304924 | -403 | Topbp1      | 77  |
| chr9 | 103423317 | -261 | 5830418P13  | 120 |
| chr9 | 105400450 | -338 | Aste1       | 192 |
| chr9 | 105400468 | -320 | Aste1       | 210 |
| chr9 | 105960842 | -200 | Col6a5      | 272 |
| chr9 | 106158411 | -274 | Glyctk      | 256 |
| chr9 | 106449109 | 469  | Abhd14b     | 53  |
| chr9 | 107568851 | -312 | Hyal2       | 135 |
| chr9 | 107667522 | -124 | Slc38a3     | 81  |
| chr9 | 108296593 | -329 | Amt         | 118 |
| chr9 | 109931600 | -174 | Mtap4       | 362 |
| chr9 | 111272213 | 368  | Epm2aip1    | 370 |
| chr9 | 112217499 | -149 | Arpp21      | 58  |
| chr9 | 114730750 | -453 | Cmtm6       | 220 |
| chr9 | 119052325 | -453 | Vill        | 146 |
| chr9 | 120092103 | -30  | Ccr8        | 179 |
| chr9 | 123113569 | 338  | Exosc7      | 7   |
| chr9 | 124423049 | -207 | 4930526I15R | 428 |
|      |           |      |             |     |

**Supplementary Table 2: Primers and antibodies list:**

| <b>qPCR primers for gene expression</b>    |                        |           |                |
|--------------------------------------------|------------------------|-----------|----------------|
| N6amt1 LP                                  | GAAGGGGAAAGTAGACCTGCT  |           |                |
| N6amt1 RP                                  | TCTTCAGGCGGAGTCACTACA  |           |                |
| N6amt2 LP                                  | CAGTGGTTCGACACTTTGT    |           |                |
| N6amt2 RP                                  | CTGGGGTTGACGGATTGCTT   |           |                |
| B-actin LP                                 | GGCTGTATTCCCCTCCATCG   |           |                |
| B-actin RP                                 | CCAGTTGGTAACAATGCCATGT |           |                |
| BDNF exon4 LP                              | GTGGACTCCCACCCACTTT    |           |                |
| BDNF exon 4 RP                             | TATTACCTCCGCCATGCAAT   |           |                |
| Rab3a LP                                   | GTGGGCAAACCTCGTTCCT    |           |                |
| Rab3a RP                                   | TCCTCTTGTCGTTGCGGTAGA  |           |                |
| BDNF Exon 1 LP                             | GCCGGCTGGTGCAGAAAAGC   |           |                |
| BDNF Exon 2 RP                             | GCACGCCGATCCTTTGCCCA   |           |                |
| <b>qPCR primers for chIP</b>               |                        |           |                |
| BDNF proximal GATC LP                      | GTGGACTCCCACCCACTTT    |           |                |
| BDNF proximal GATC RP                      | ATTGCATGGCGGAGGTAATA   |           |                |
| BDNF distal GATC LP                        | GTTTAACAAAGCAGCAATCCA  |           |                |
| BDNF distal GATC RP                        | AGTGGTCTTTGGACCGTTTTT  |           |                |
| Rab3a GATC LP                              | GGCGGGAGGATCAAGAGTTC   |           |                |
| Rab3a GATC RP                              | TGAGACGTGAAGCACTCAGG   |           |                |
| BDNF p1 GATC LP                            | TAGTGGGAAGTGTAGTGGCC   |           |                |
| BDNF p1 GATC RP                            | TGTAGGCTAGGAGGGGAAGA   |           |                |
| <b>shRNA or scrambled control sequence</b> |                        |           |                |
| N6amt1 shRNA scrambled control             | GCACATTCTCTGATTAGTTAT  |           |                |
| N6amt1 shRNA                               | TGTTCTACTTAGTTACCGTAA  |           |                |
| N6amt2 shRNA scrambled control             | GCATCTGACAGGCTTAACCT   |           |                |
| N6amt2 shRNA                               | CCGCTGTTACACGAACTATG   |           |                |
| <b>List of Antibodies</b>                  |                        |           |                |
| Name                                       | HOST                   | Cat#      | Company        |
| H4K4me3                                    | rabbit                 | 39915     | active motif   |
| YY1                                        | rabbit                 | ab38422   | Abcam          |
| Pol II                                     | rabbit                 | sc-899X   | Santa Cruz     |
| m6dA                                       | rabbit                 | 61495     | active motif   |
| N6amt1                                     | rabbit                 | SC-83304  | Santa Cruz     |
| N6amt2                                     | mouse                  | SC-390240 | Santa Cruz     |
| IgG                                        | Rabbit                 | 29293     | Cell signaling |
| IgG                                        | mouse                  | SC-2025   | Santa Cruz     |
| IgG                                        | mouse                  | 103533    | active motif   |
| Beta actin                                 | mouse                  | SC-69879  | Santa Cruz     |

|              |        |               |            |
|--------------|--------|---------------|------------|
| Beta tubulin | mouse  | SC-55529      | Santa Cruz |
| NeuN-488     | Rabbit | Ab190195      | Abcam      |
| Arc-647      | Rabbit | BS-0385R-A647 | Bioss      |
